# Supplementary material
Source: PubMed Central journal article supplement (PMC6393195)
Supplement: NIHMS1519422-supplement-Major_Resource_Table.pdf [file NIHMS1519422-supplement-Major_Resource_Table.pdf]

## Major Resources Tables

### Animals (in vivo studies)

| Species | Vendor or Source | Background Strain | Sex |
|---------|------------------|-------------------|-----|
| -       | -                | -                 | -   |
|         |                  |                   |     |
|         |                  |                   |     |

### Animal breeding

|                 | Species | Vendor or Source | Background Strain | Other Information |
|-----------------|---------|------------------|-------------------|-------------------|
| Parent - Male   | -       |                  |                   |                   |
| Parent - Female | -       |                  |                   |                   |

### Antibodies

| Target antigen                   | Vendor or Source         | Catalog #   | Working concentration | Lot # (preferred but not required) |
|----------------------------------|--------------------------|-------------|-----------------------|------------------------------------|
| anti-human $\alpha$ -SMA         | Santa Cruz               | sc-3225     | 400 ng/mL             |                                    |
| anti-human von Willebrand factor | Abcam                    | ab6994      | 100 ng/mL             |                                    |
| CY3-conjugated Streptavidin      | Jackson ImmunoResearch   | 016-160-084 | 1000 ng/mL            |                                    |
| Biotin                           | Jackson ImmunoResearch   | 715-065-150 | 1000 ng/mL            |                                    |
| anti-human RUNX2                 | Proteintech              | 20700-1-AP  | 60 ng/mL              |                                    |
| Alexa Fluor 488                  | Thermo Fisher Scientific | A11070      | 2000 ng/mL            |                                    |
| anti-human LAMP1                 | Abcam                    | ab24170     | 1000 ng/mL            |                                    |
| anti-human H-ferritin            | Santa Cruz               | sc-376594   | 400 ng/mL             |                                    |
| Alexa 647                        | Thermo Fisher Scientific | A21244      | 4000 ng/mL            |                                    |
| anti-human Sox9                  | Abcam                    | ab26414     | 2000 ng/mL            |                                    |
| anti-human CD31                  | Abcam                    | ab27333     | 1000 ng/mL            |                                    |
| anti-human Pit1                  | Abcam                    | ab177147    | 2000 ng/mL            |                                    |
| anti-human Pit2                  | Proteintech              | 12820-1-AP  | 60 ng/mL              |                                    |
| anti-human ENPP2                 | Thermo Fisher Scientific | PA5-12478   | 4000 ng/mL            |                                    |
| anti-human TNF- $\alpha$         | Thermo Fisher Scientific | PA5-19810   | 400 ng/mL             |                                    |

|                         |            |          |            |  |
|-------------------------|------------|----------|------------|--|
| anti-human IL1- $\beta$ | Invitrogen | 17h18116 | 400 ng/mL  |  |
| anti-human ALP          | Abcam      | ab65834  | 1000 ng/mL |  |

### Cultured Cells

| Name                              | Vendor or Source                                                           | Sex (F, M, or unknown) |
|-----------------------------------|----------------------------------------------------------------------------|------------------------|
| Valvular Interstitial cells       | Department of Cardiac Surgery, Faculty of Medicine, University of Debrecen | male and female        |
| VIC (valvular interstitial cells) | Innoprot Ltd.                                                              | male                   |
| Healthy heart valve VIC           | Department of Forensic Medicine, University of Debrecen                    | male and female        |
